# Supplementary material for: Emblica officinalis Garten fruits extract ameliorates reproductive injury and oxidative testicular toxicity induced by chlorpyrifos in male rats
Source: PubMed Central journal article supplement (PMC3824715; doi:10.1186/2193-1801-2-541), 2013-10-17

# Uric acid level for 30 days

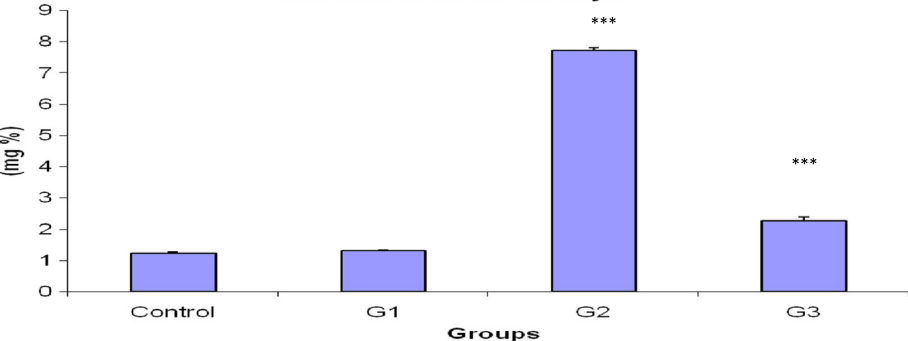

Supplement: 40064_2013_598_MOESM3_ESM.pdf [file 40064_2013_598_MOESM3_ESM.pdf]
